# Supplementary material
Source: PubMed Central journal article supplement (PMC3255795)

**A**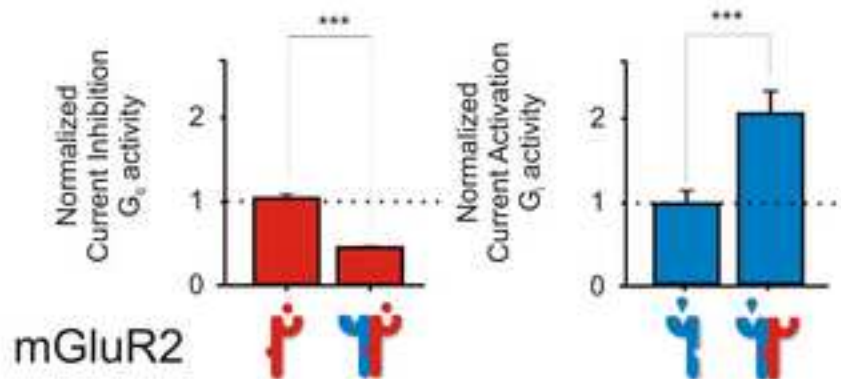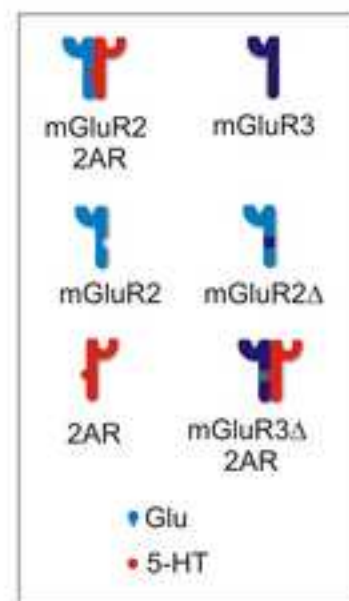**B**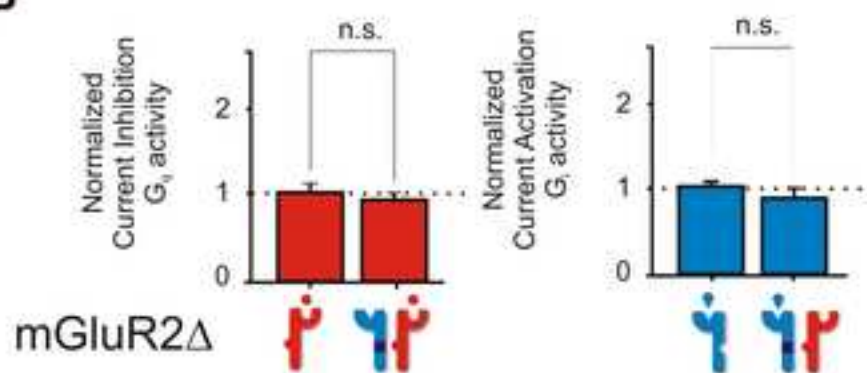**C**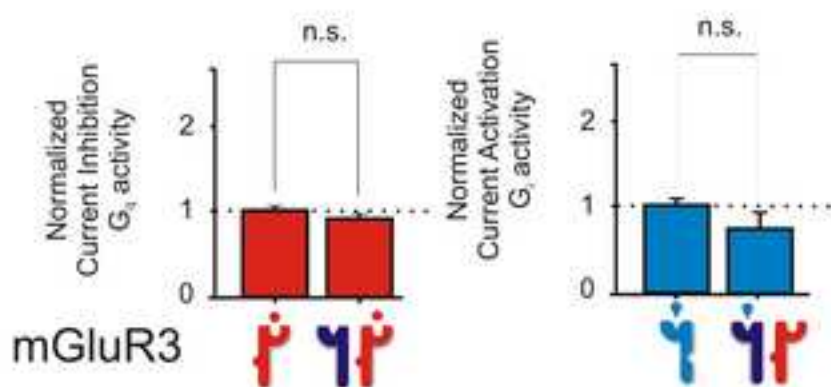**D**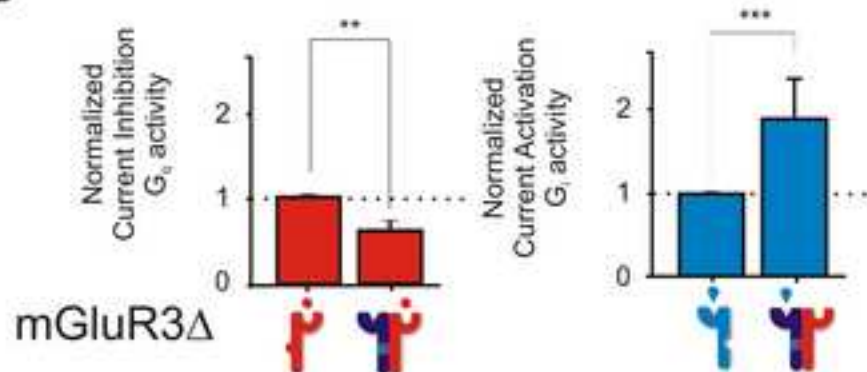**E**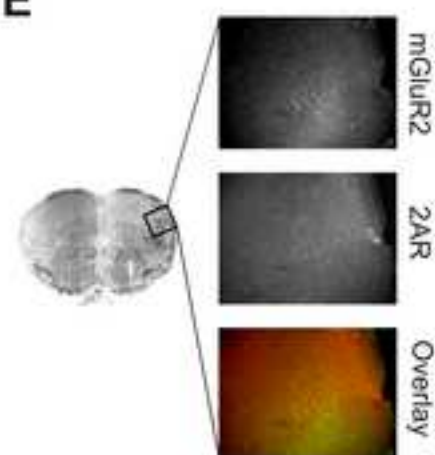

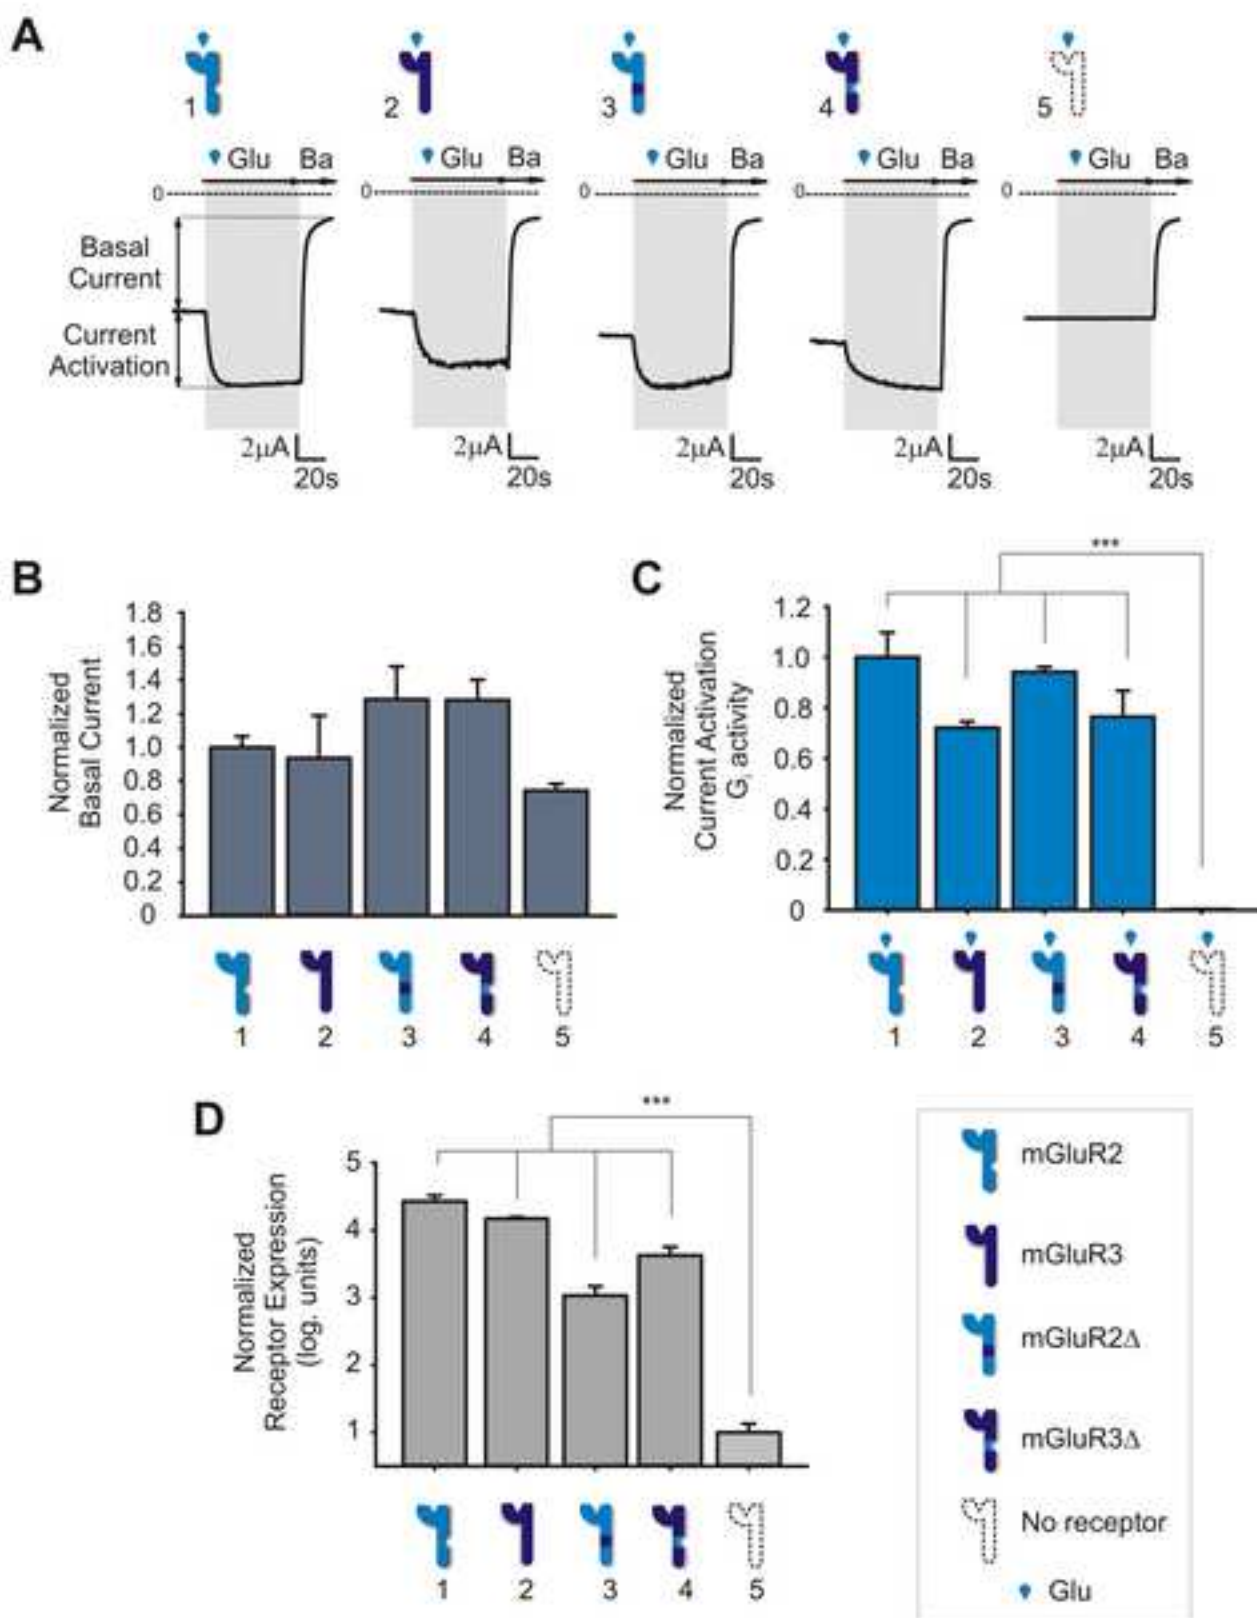

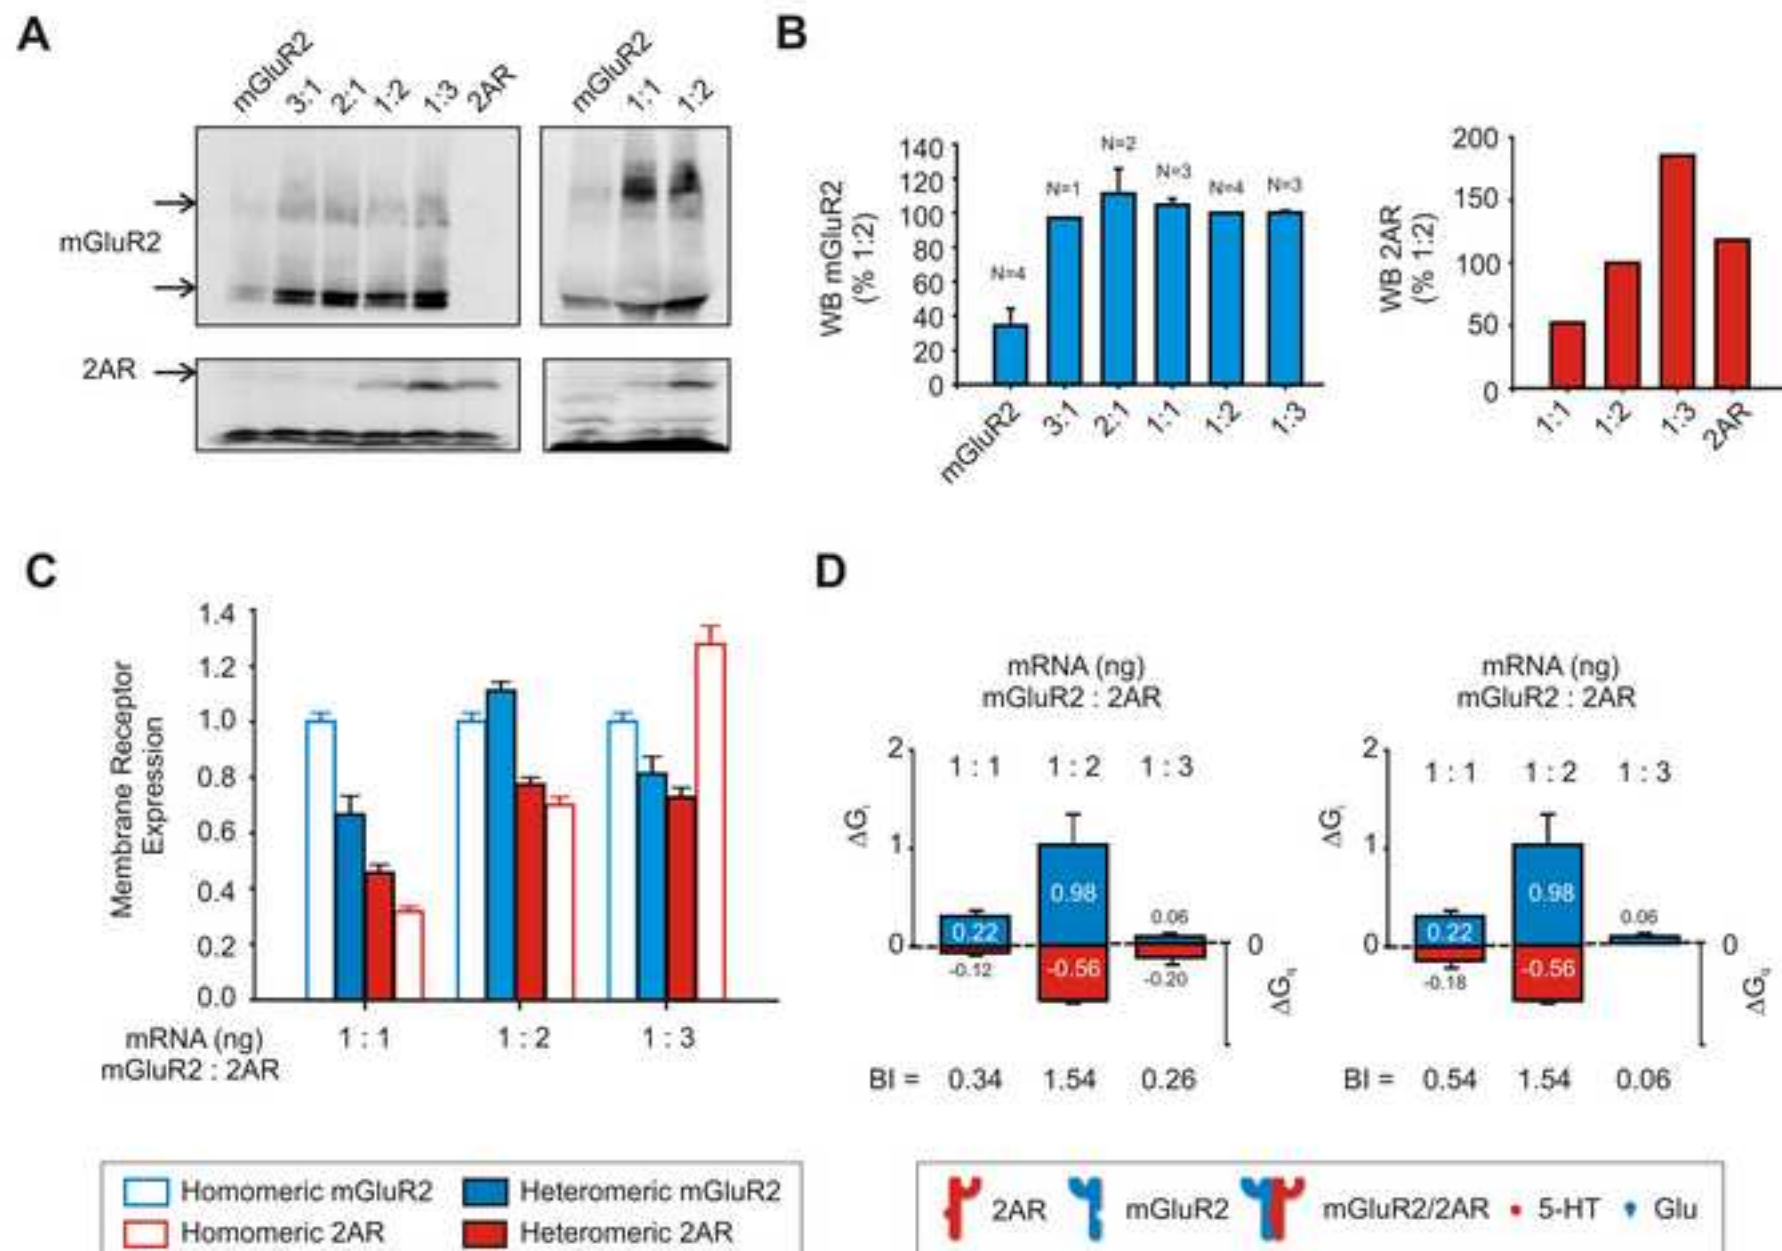

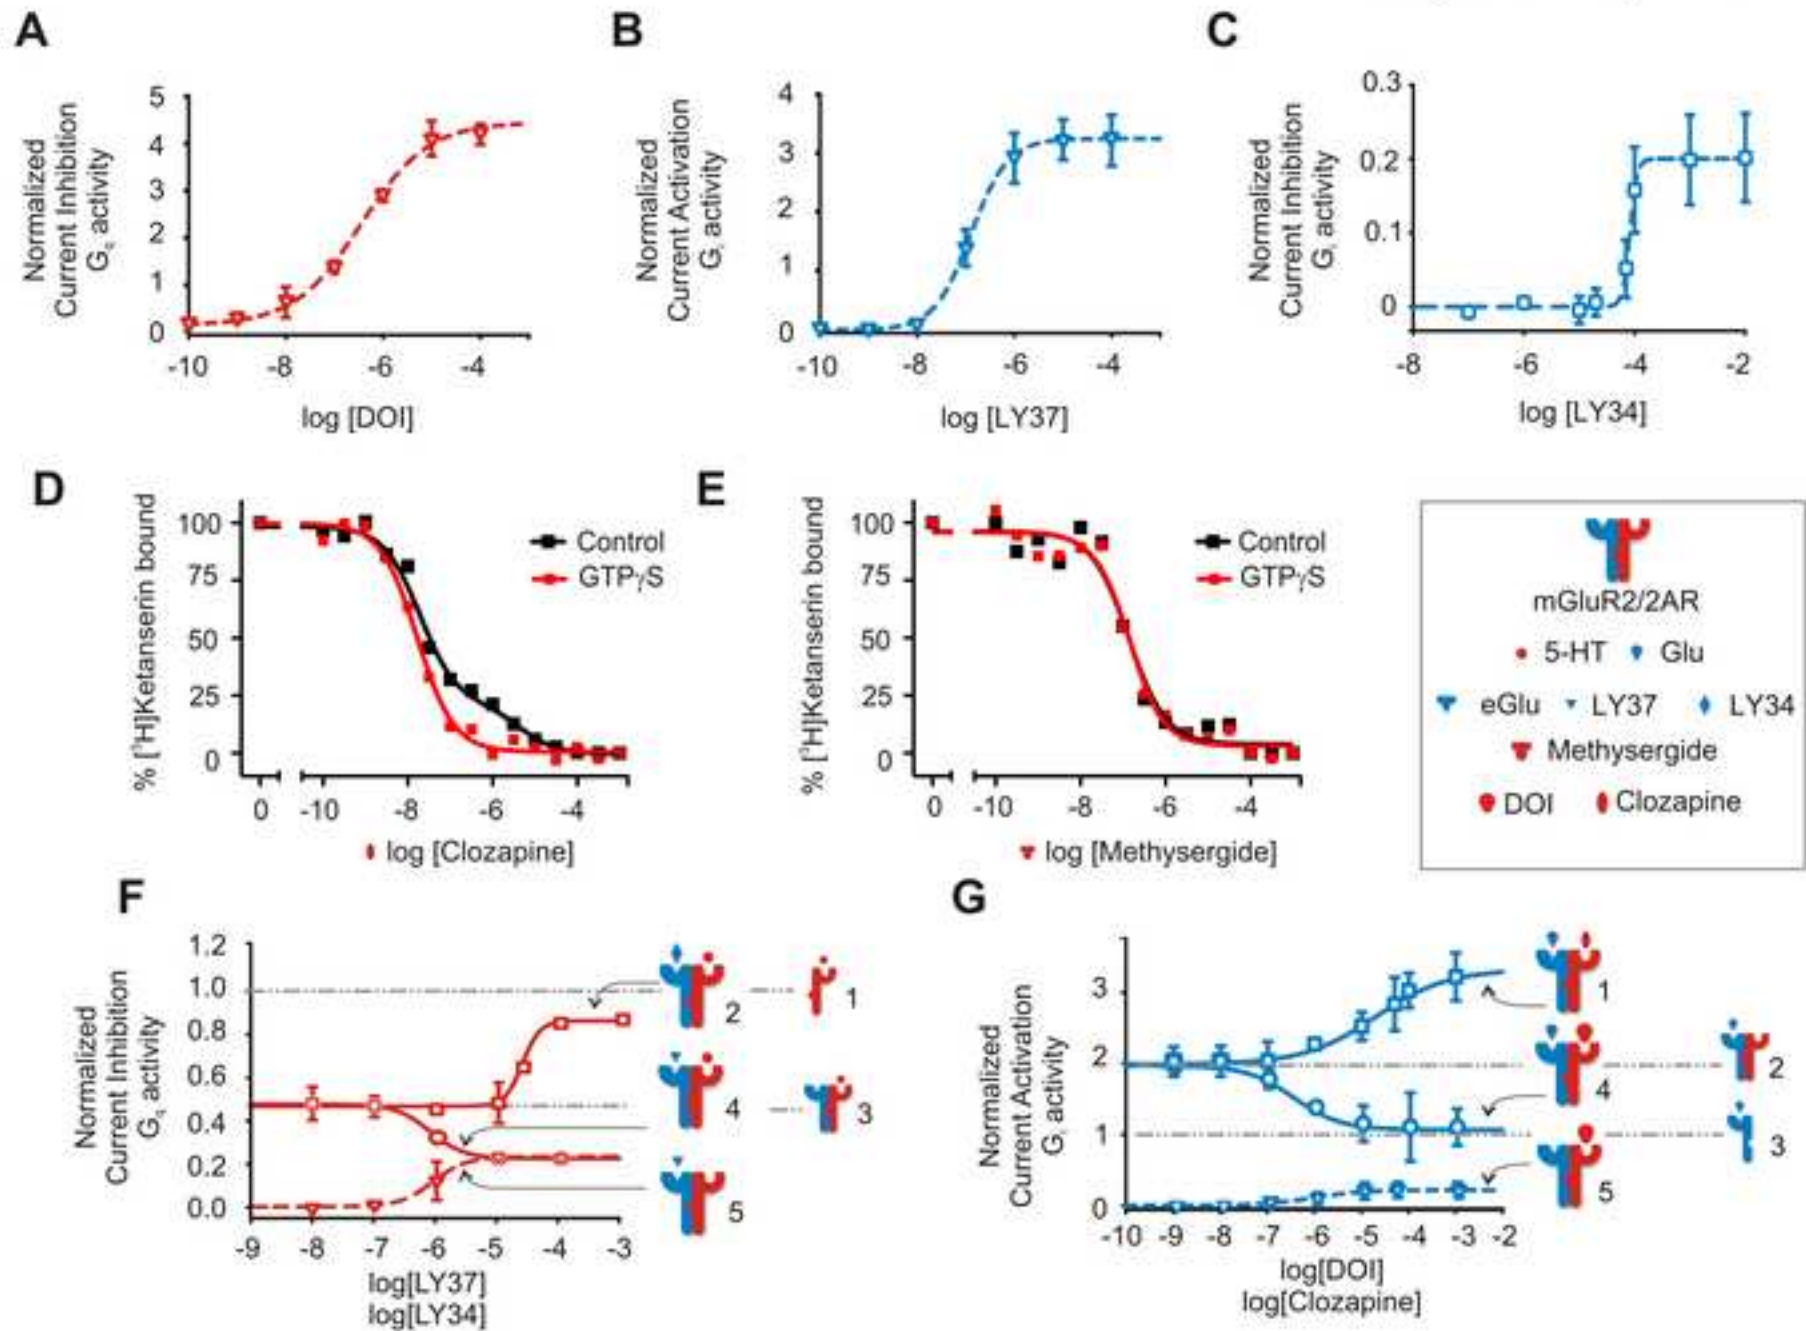



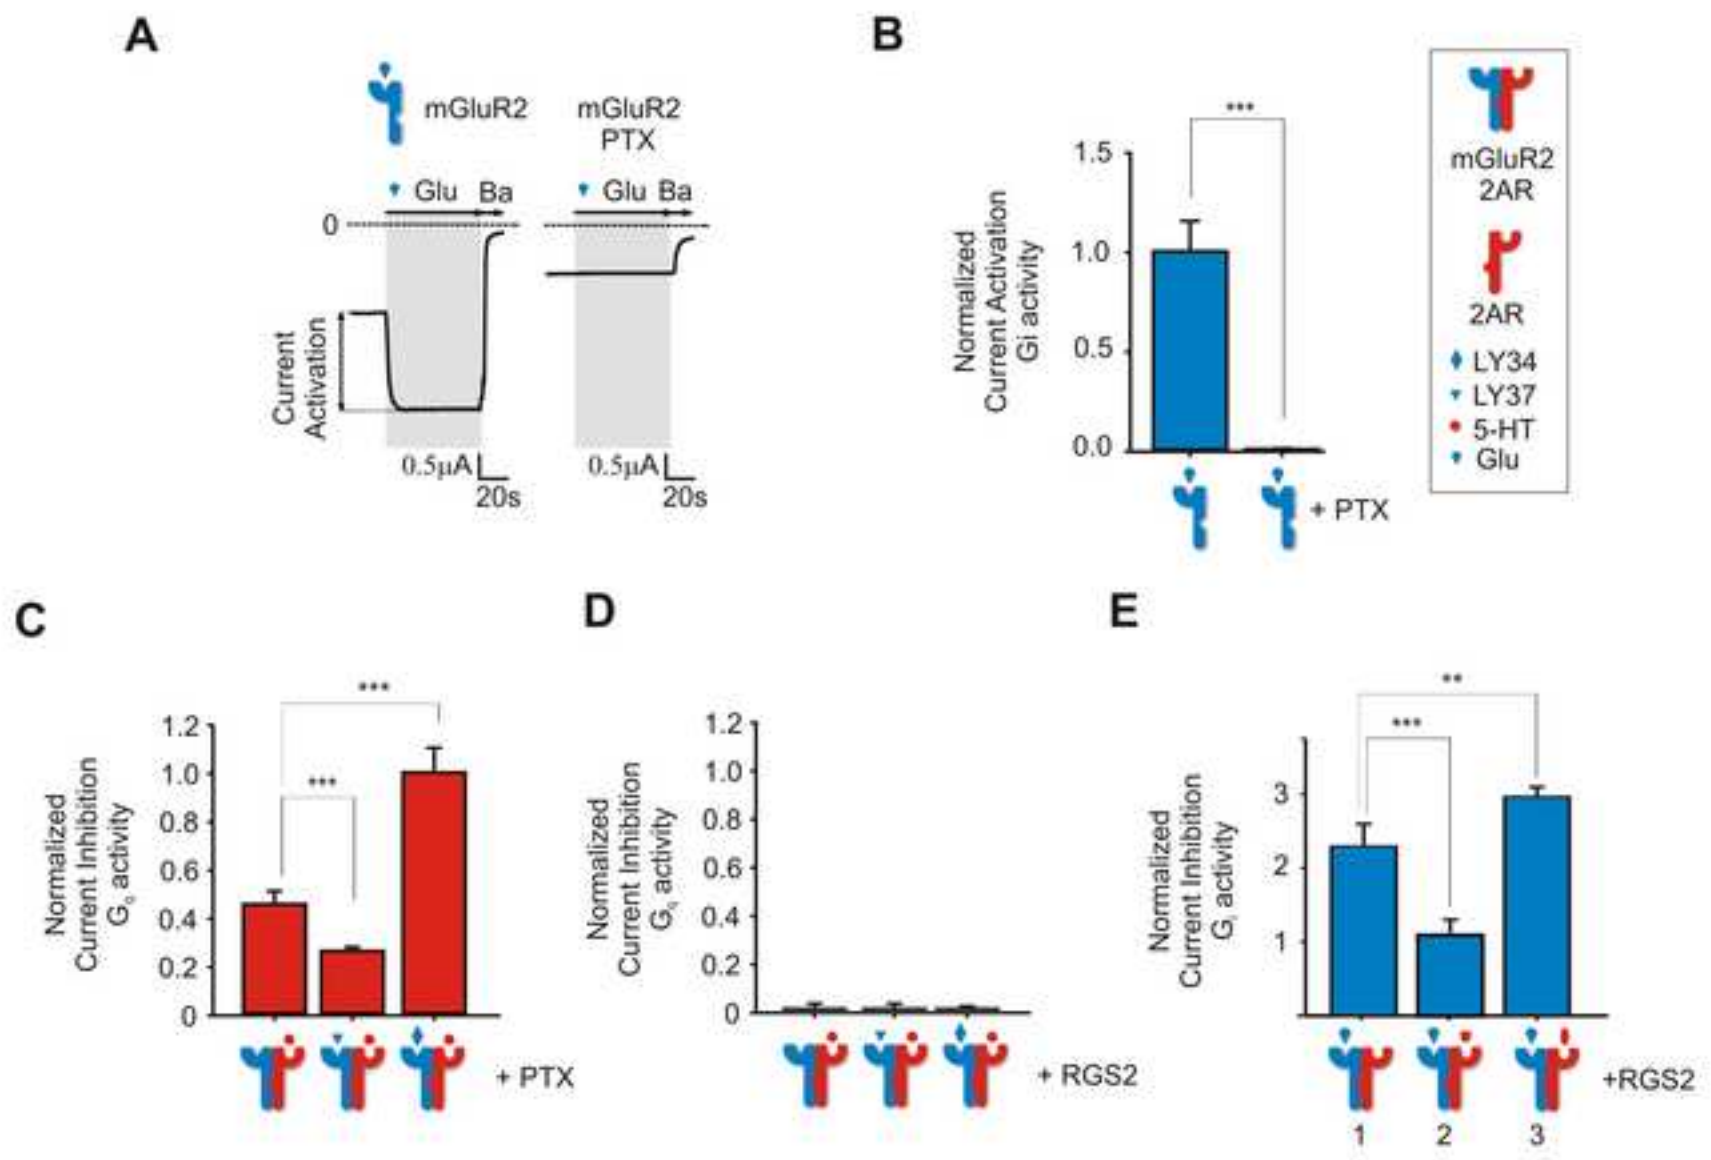

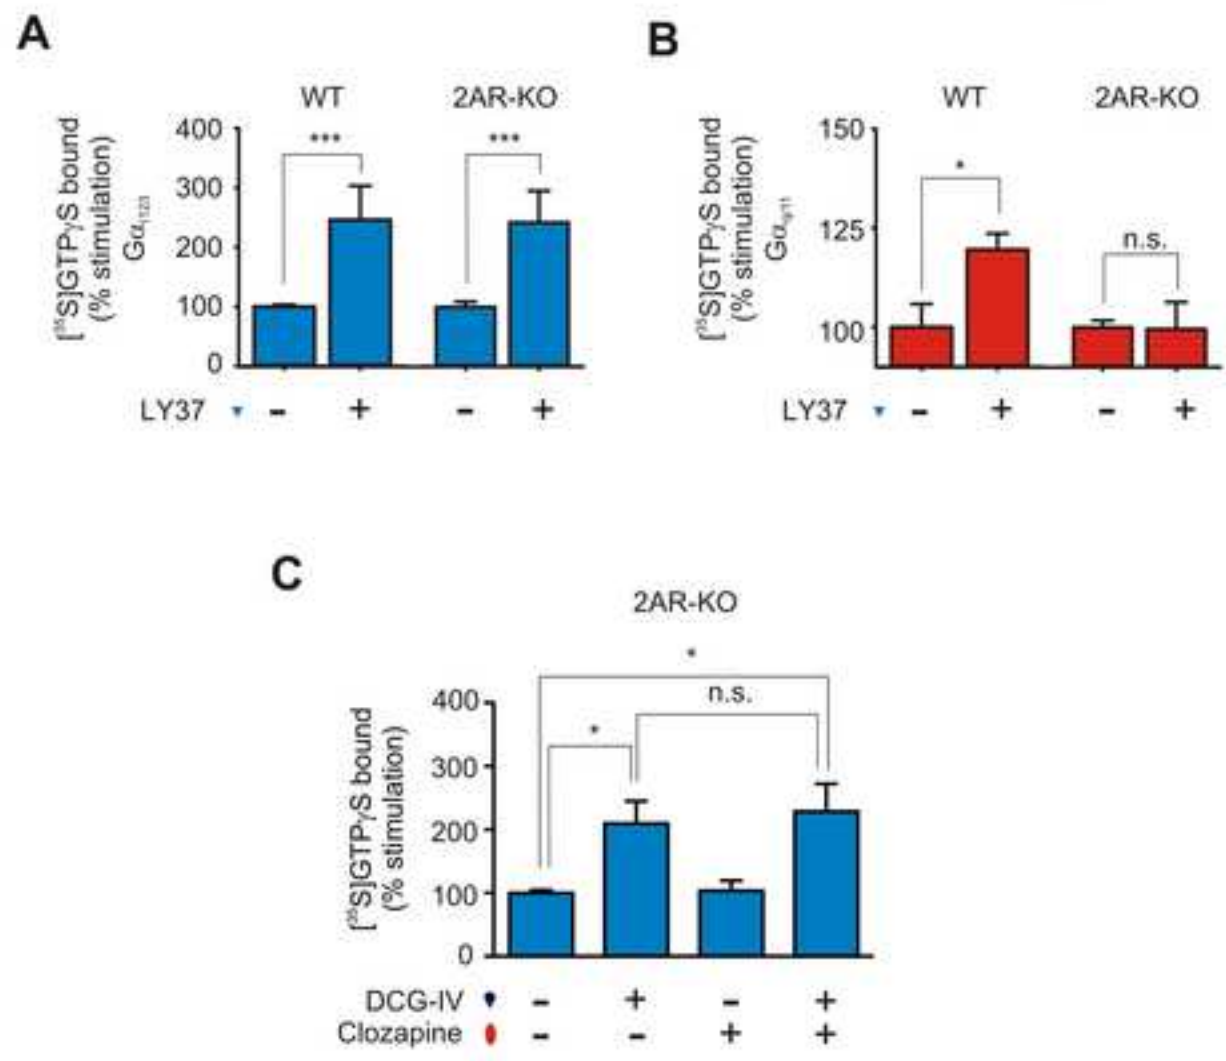

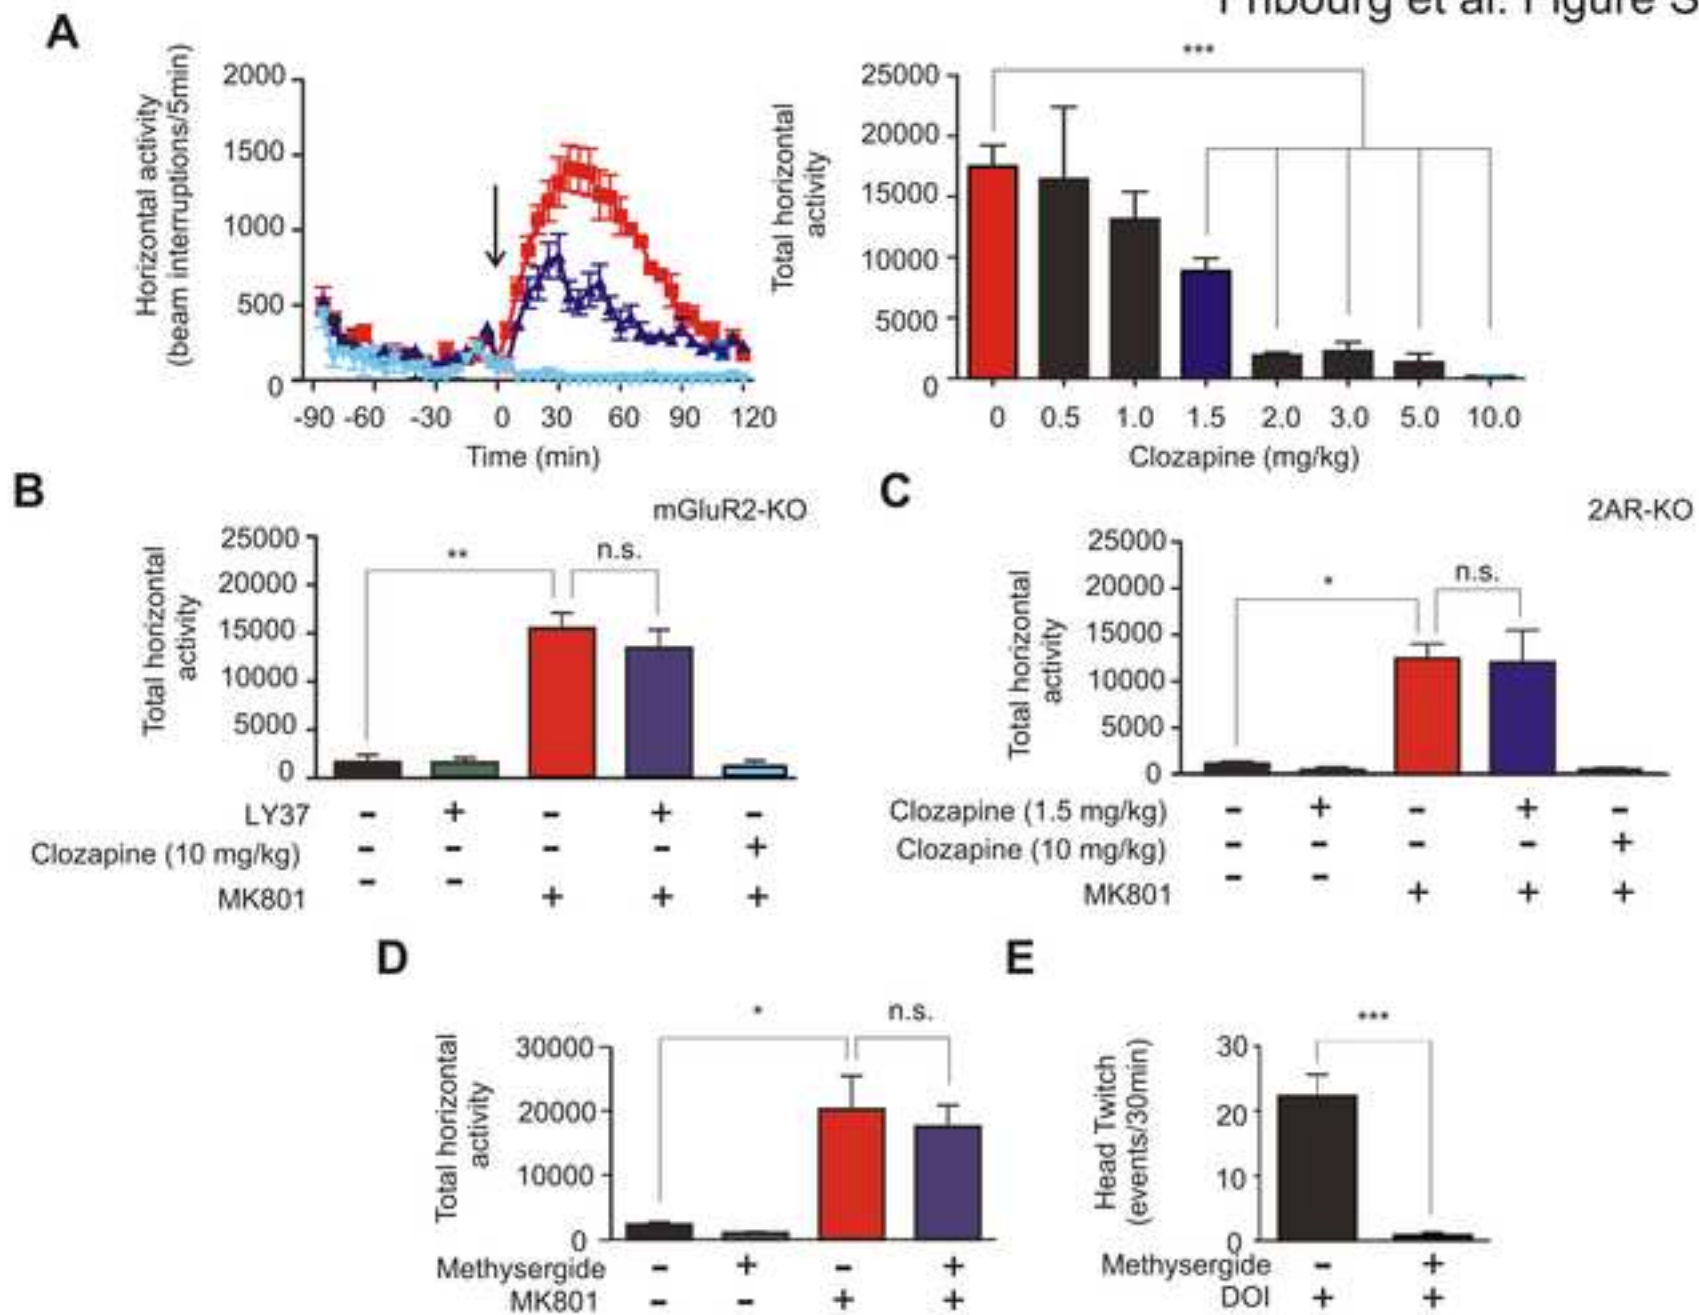

Supplement: NIHMS337163-supplement-02.pdf [file NIHMS337163-supplement-02.pdf]
